# Supplementary material for: TRPC1 links calcium signaling to cellular senescence in the protection against posttraumatic osteoarthritis
Source: JCI journal article supplement (doi:10.1172/jci.insight.182103), 2024-12-24
Supplement: sd1 [file 1]

**Transient receptor potential channel 1 (TRPC1) links intracellular calcium signaling to cellular senescence and is required for protection against post-traumatic osteoarthritis.**

**Supplemental materials**

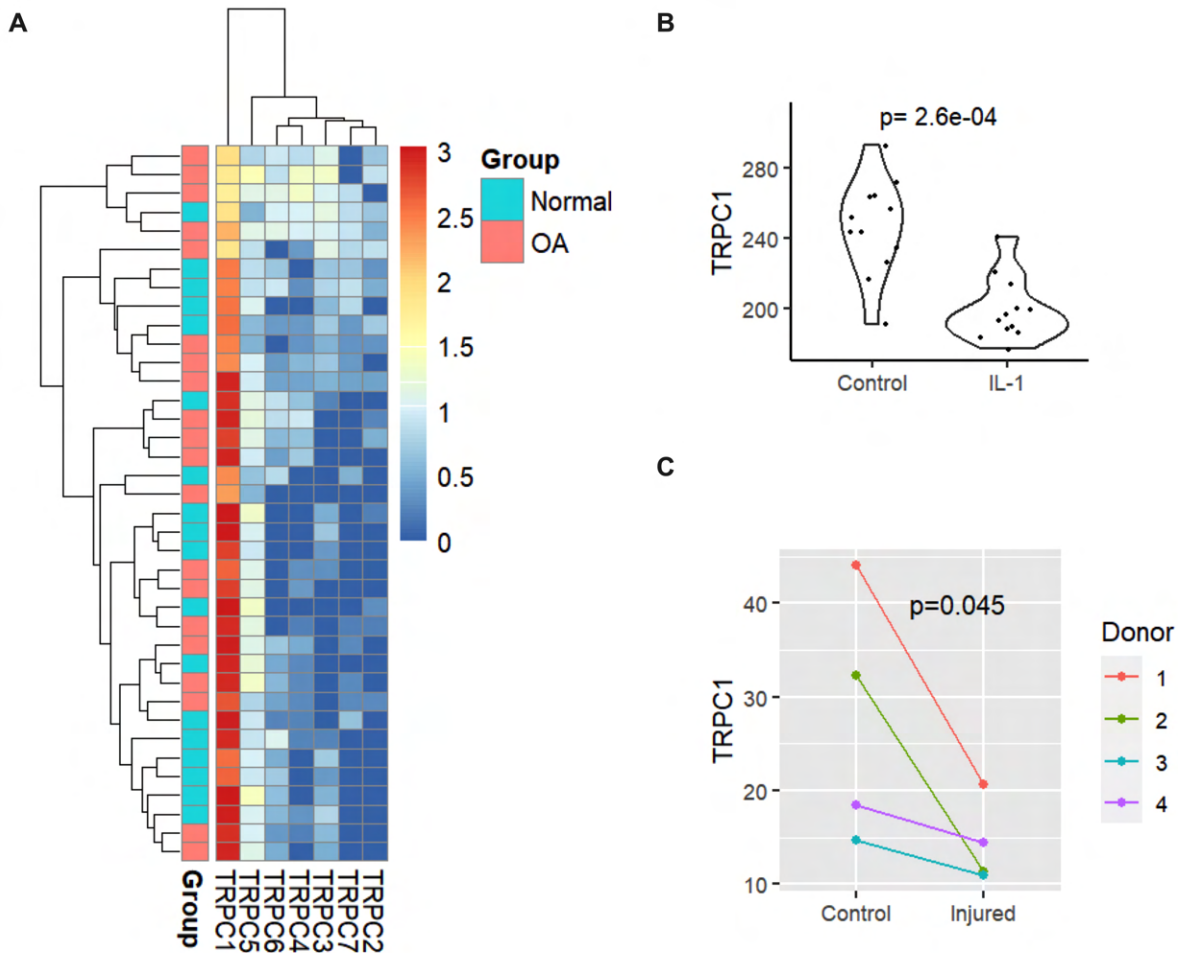

**Supplemental Figure 1.** (A) Post-hoc analysis of RNAseq data for TRPC channel expression in human normal and OA cartilage (GEO: GSE114007) (1) (B) Post-hoc analysis of microarray data from IL-1 $\beta$  treated human OA chondrocytes showing downregulation of TRPC1 gene expression following IL-1 $\beta$  application (GEO: GSE75181) (2). (C) Microarray gene expression data comparing TRPC1 expression in human cartilage before and following cutting injury (3) P-value: paired t-test after reciprocal transformation (n = 4).

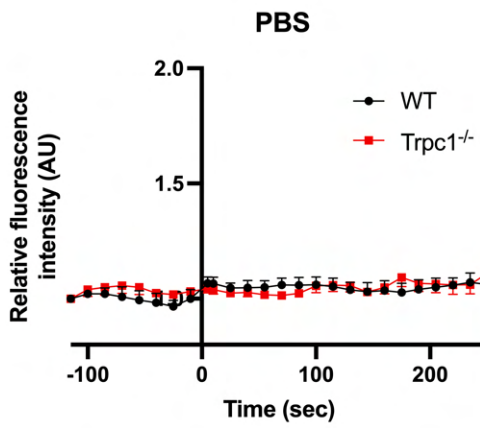

**Supplemental Figure 2.** Time course analysis of intracellular Ca<sup>2+</sup> levels as measured by fluorescence intensity of loaded Fluo-4 Ca<sup>2+</sup> indicator in wild type and Trpc1<sup>-/-</sup> chondrocytes during stimulation with PBS (negative control)

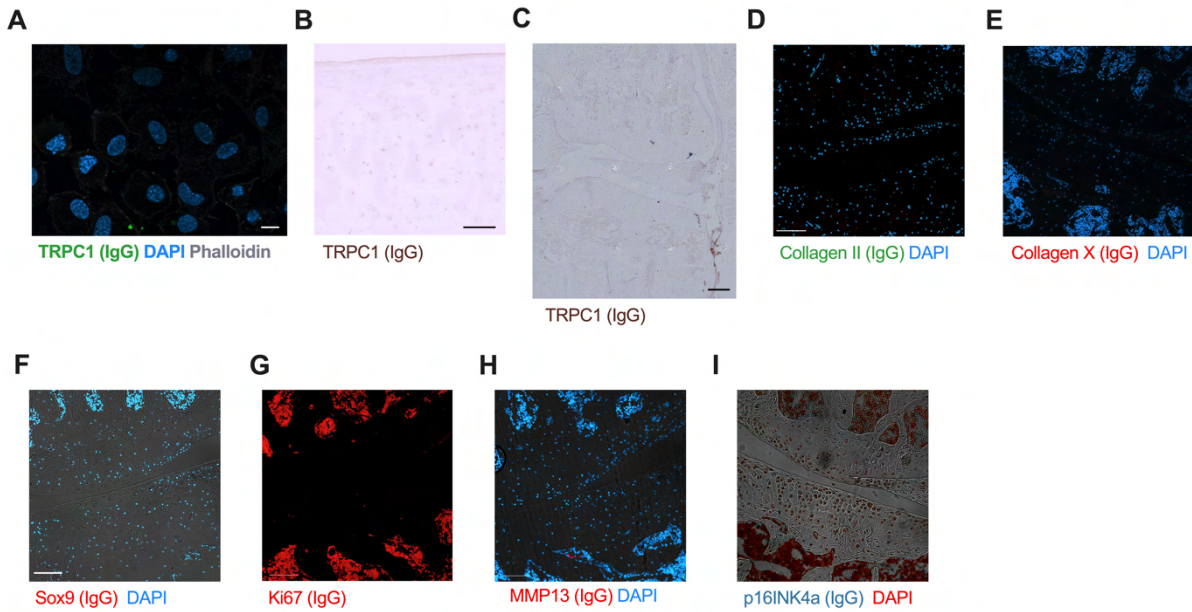

**Supplemental Figure 3.** (A) IgG isotype negative control for TRPC1 immunofluorescence staining on P0 murine chondrocytes. Scale bar: 20  $\mu\text{m}$ . (B) IgG isotype negative control for TRPC1 immunohistochemical staining on human healthy cartilage paraffin section. Scale bar: 100  $\mu\text{m}$ . (C) IgG isotype negative control for TRPC1 immunohistochemical staining on murine sham operated knee joint section. Scale bar: 100  $\mu\text{m}$ . (D) IgG isotype negative control for type II collagen immunofluorescence staining on murine sham operated knee joint section. Scale bar: 100  $\mu\text{m}$ . (E) IgG isotype negative control for type X collagen immunofluorescence staining on murine 2 weeks post-DMM knee joint section. Scale bar: 100  $\mu\text{m}$ . (F) IgG isotype negative control for Sox9 immunofluorescence staining on murine sham operated knee joint section. Scale bar: 100  $\mu\text{m}$ . (G) IgG isotype negative control for Ki67 immunofluorescence staining on murine 2 weeks post-DMM knee joint section. Scale bar: 100  $\mu\text{m}$ . (H) IgG isotype negative control for MMP-13 immunofluorescence staining on murine 2 weeks post-DMM knee joint section. Scale bar: 100  $\mu\text{m}$ . (I) IgG isotype negative control for p16INK4a immunofluorescence staining on murine 2 weeks post-DMM knee joint section. Scale bar: 100  $\mu\text{m}$ . Where present, DAPI (blue) was used to label nuclei.

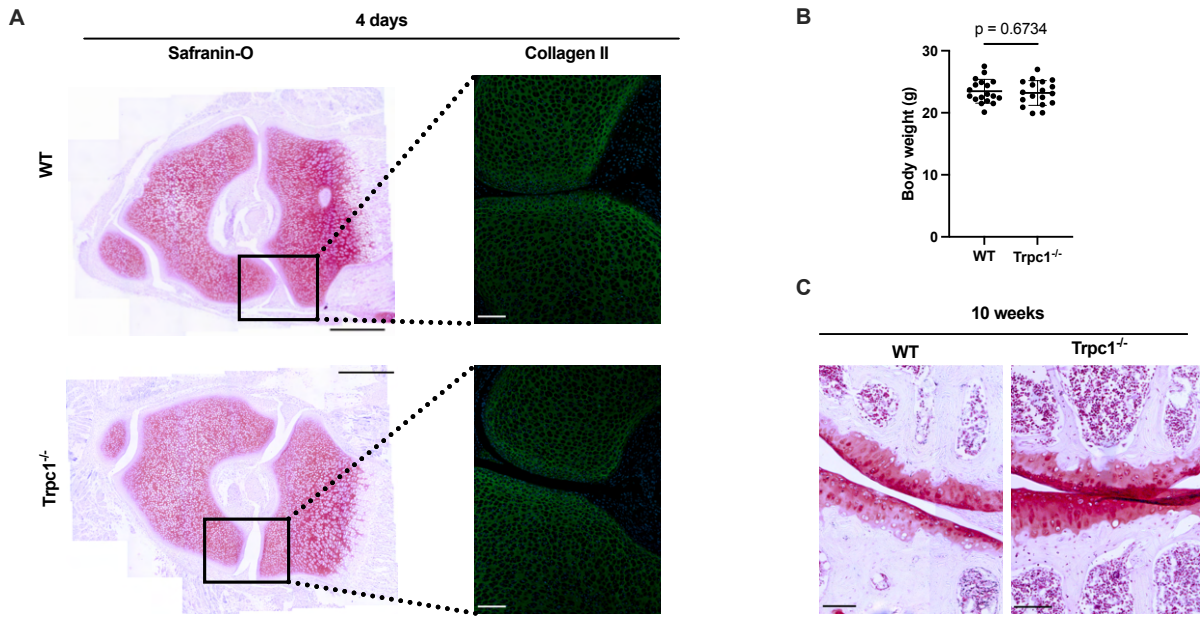

**Supplemental Figure 4.** (A) Safranin-O histology and type II collagen immunofluorescence staining of murine 4 day old wild type and *Trpc1*<sup>-/-</sup> knee joint sections demonstrating no obvious abnormalities caused by *Trpc1* deficiency during development. Scale bars: 500  $\mu$ m (Safranin-O) and 100  $\mu$ m (type II collagen, green). (B) Comparison of total body weights of 10 weeks old male wild type and *Trpc1*<sup>-/-</sup> mice at time of DMM. P value: unpaired t-test (n = 18). (C) Safranin-o staining of 10-week old unchallenged male murine knee joint sections. Scale bar: 100  $\mu$ m.

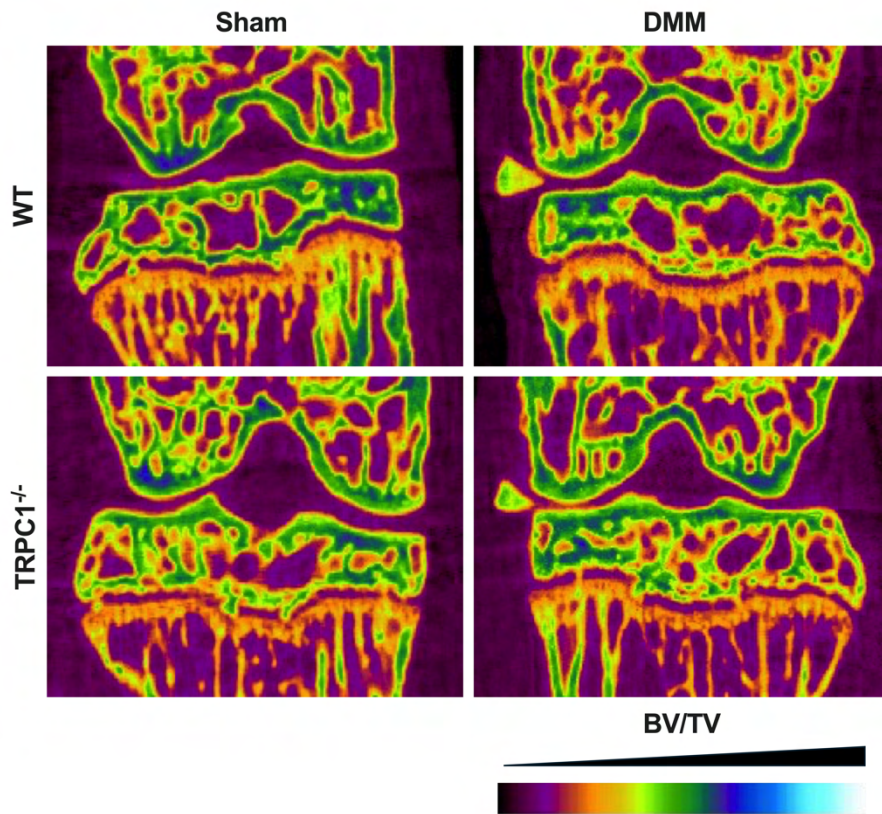

**Supplemental Figure 5.** Representative frontal cross section images taken from microCT analyses of wild type and *Trpc1*<sup>-/-</sup> knee joints 2 weeks post-DMM. Colour spectrum illustrates changes in BV/TV.

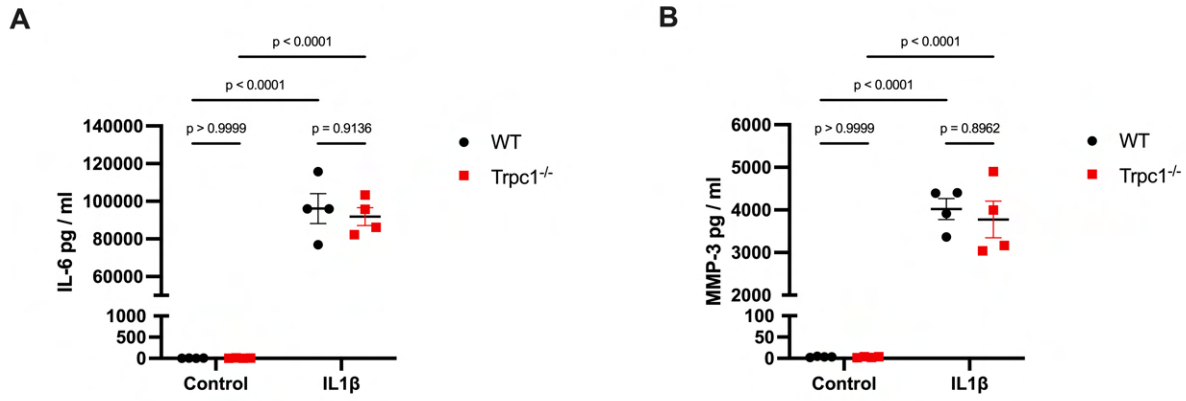

**Supplemental Figure 6.** Protein concentration analyses of murine IL-6 and MMP-3 within supernatants of wild type and *Trpc1*<sup>-/-</sup> chondrocytes after 24 hours stimulation with 10 ng/ml IL-1 $\beta$  and 48 hours further culture in control medium measured by ELISA (n = 4). P values: 2-way ANOVA with multiple comparisons.

**Supplemental Table 1.** Top 100 differentially expressed genes found within RNA sequencing comparison articular cartilage collected from wild type and *Trpc1*<sup>-/-</sup> mice 2 weeks post-DMM.

| gene_id            | geneSymbol  | baseMean | log2FoldChange | lfcSE  | stat   | pvalue    | padj       |
|--------------------|-------------|----------|----------------|--------|--------|-----------|------------|
| ENSMUSG00000050550 | Gm11868     | 654,54   | 2,90671818     | 0,3121 | 9,3119 | 1,255E-20 | 1,0302E-16 |
| ENSMUSG00000094497 | Gm8210      | 1133,71  | 2,216069522    | 0,4597 | 4,8212 | 1,427E-06 | 0,00060075 |
| ENSMUSG00000083833 | Gm13841     | 1202,01  | 2,153237441    | 0,4226 | 5,0949 | 3,489E-07 | 0,00020456 |
| ENSMUSG00000096632 | Igkv9-124   | 161,49   | 2,091116993    | 0,3786 | 5,5236 | 3,322E-08 | 2,479E-05  |
| ENSMUSG00000096712 | Gm15454     | 204,10   | 1,535250393    | 0,2301 | 6,6726 | 2,513E-11 | 6,8747E-08 |
| ENSMUSG00000096715 | Igkv3-4     | 143,83   | 1,43307761     | 0,3245 | 4,4161 | 1,005E-05 | 0,002578   |
| ENSMUSG00000094546 | Ighv1-26    | 754,58   | 1,362296619    | 0,2149 | 6,3397 | 2,302E-10 | 3,7795E-07 |
| ENSMUSG00000116637 | Gm8130      | 79,63    | 1,230868486    | 0,2595 | 4,7432 | 2,104E-06 | 0,00082225 |
| ENSMUSG00000116875 | Morf4l1-ps1 | 258,74   | 1,041319953    | 0,1467 | 7,0997 | 1,251E-12 | 4,106E-09  |
| ENSMUSG00000094446 | Gm6344      | 356,97   | 0,991965094    | 0,1766 | 5,6175 | 1,938E-08 | 1,5801E-05 |
| ENSMUSG00000062611 | Rps3a2      | 4418,44  | 0,958697538    | 0,1786 | 5,3682 | 7,953E-08 | 5,2225E-05 |
| ENSMUSG00000058126 | Tpm3-rs7    | 3720,32  | 0,922204706    | 0,1909 | 4,8304 | 1,362E-06 | 0,00058858 |
| ENSMUSG00000099974 | Bcl2a1d     | 129,08   | 0,831627005    | 0,1933 | 4,3028 | 1,686E-05 | 0,00369128 |
| ENSMUSG00000035692 | Isg15       | 1243,57  | 0,790102163    | 0,1355 | 5,8315 | 5,492E-09 | 4,7453E-06 |
| ENSMUSG00000066361 | Serpina3c   | 403,62   | 0,746323368    | 0,1578 | 4,7292 | 2,254E-06 | 0,00084341 |
| ENSMUSG00000038871 | Bpgm        | 24042,67 | 0,719360606    | 0,1665 | 4,3194 | 1,565E-05 | 0,00347116 |
| ENSMUSG00000036594 | H2-Aa       | 10198,99 | 0,627216499    | 0,1138 | 5,5103 | 3,583E-08 | 2,5576E-05 |
| ENSMUSG00000044468 | Tent5c      | 47083,11 | 0,61527824     | 0,0625 | 9,8451 | 7,193E-23 | 1,1809E-18 |
| ENSMUSG00000090113 | Nhlrc4      | 373,58   | 0,600002707    | 0,1305 | 4,5985 | 4,256E-06 | 0,00124781 |
| ENSMUSG00000060586 | H2-Eb1      | 5694,52  | 0,590545487    | 0,1053 | 5,6102 | 2,021E-08 | 1,5801E-05 |
| ENSMUSG00000020641 | Rsad2       | 24839,68 | 0,57672145     | 0,1317 | 4,3795 | 1,19E-05  | 0,00278983 |
| ENSMUSG00000022748 | Cmss1       | 367,51   | 0,56726312     | 0,1200 | 4,7286 | 2,26E-06  | 0,00084341 |
| ENSMUSG00000081992 | Gm13408     | 985,20   | 0,553932197    | 0,1298 | 4,2666 | 1,984E-05 | 0,00408861 |
| ENSMUSG00000040569 | Slc26a7     | 841,57   | 0,544000441    | 0,1238 | 4,3939 | 1,113E-05 | 0,00269637 |
| ENSMUSG00000073421 | H2-Ab1      | 6743,88  | 0,532691776    | 0,1220 | 4,3658 | 1,267E-05 | 0,00292853 |
| ENSMUSG00000026348 | Acmsd       | 595,91   | 0,515277168    | 0,1222 | 4,2168 | 2,478E-05 | 0,00478686 |
| ENSMUSG00000034127 | Tspan8      | 1926,78  | 0,501010638    | 0,1073 | 4,6675 | 3,049E-06 | 0,0010309  |
| ENSMUSG00000032411 | Tfdp2       | 21571,66 | 0,497572187    | 0,0647 | 7,6953 | 1,411E-14 | 7,7219E-11 |
| ENSMUSG00000022051 | Bnip3l      | 22669,13 | 0,495603975    | 0,1160 | 4,2720 | 1,937E-05 | 0,00407664 |
| ENSMUSG00000078139 | AK157302    | 1509,73  | 0,485021183    | 0,1038 | 4,6723 | 2,979E-06 | 0,0010309  |
| ENSMUSG00000044792 | Isca1       | 11732,58 | 0,481712056    | 0,0952 | 5,0622 | 4,144E-07 | 0,00022678 |
| ENSMUSG00000040435 | Ppp1r15a    | 10355,53 | 0,476060159    | 0,1138 | 4,1840 | 2,864E-05 | 0,00528342 |
| ENSMUSG00000035472 | Slc25a21    | 1277,46  | 0,469971541    | 0,0797 | 5,8975 | 3,69E-09  | 4,1602E-06 |
| ENSMUSG00000042770 | Hebp1       | 2974,00  | 0,466525391    | 0,1062 | 4,3932 | 1,117E-05 | 0,00269637 |
| ENSMUSG00000028906 | Epb41       | 55559,35 | 0,450217808    | 0,0767 | 5,8722 | 4,299E-09 | 4,1602E-06 |
| ENSMUSG00000011179 | Odc1        | 22000,69 | 0,446787085    | 0,1003 | 4,4529 | 8,474E-06 | 0,00220813 |
| ENSMUSG00000028124 | Gclm        | 9047,81  | 0,444875212    | 0,0700 | 6,3560 | 2,071E-10 | 3,7783E-07 |
| ENSMUSG00000023926 | Rhag        | 7621,03  | 0,439430617    | 0,0865 | 5,0784 | 3,806E-07 | 0,00021547 |
| ENSMUSG00000090946 | Ccdc71l     | 4615,42  | 0,40475105     | 0,0968 | 4,1801 | 2,914E-05 | 0,00531572 |

|                     |           |           |              |        |         |           |            |
|---------------------|-----------|-----------|--------------|--------|---------|-----------|------------|
| ENSMUSG00000027322  | Siglec1   | 2895,53   | 0,399967298  | 0,0863 | 4,6320  | 3,621E-06 | 0,0011009  |
| ENSMUSG00000024588  | Fech      | 34158,88  | 0,39649454   | 0,0732 | 5,4138  | 6,172E-08 | 4,2216E-05 |
| ENSMUSG00000040675  | Mthfd1l   | 3352,66   | 0,387897236  | 0,0862 | 4,5022  | 6,726E-06 | 0,0017811  |
| ENSMUSG00000029802  | Abcg2     | 5581,07   | 0,384118904  | 0,0654 | 5,8715  | 4,319E-09 | 4,1602E-06 |
| ENSMUSG00000042066  | Tmcc2     | 32119,83  | 0,374662968  | 0,0854 | 4,3863  | 1,153E-05 | 0,00274291 |
| ENSMUSG00000042225  | Ammecr1   | 3543,00   | 0,358534661  | 0,0589 | 6,0821  | 1,186E-09 | 1,4978E-06 |
| ENSMUSG00000006574  | Slc4a1    | 107387,75 | 0,343172096  | 0,0818 | 4,1970  | 2,704E-05 | 0,00504513 |
| ENSMUSG00000028436  | Dcaf12    | 14430,42  | 0,33953874   | 0,0729 | 4,6546  | 3,246E-06 | 0,0010309  |
| ENSMUSG00000027115  | Kif18a    | 4817,40   | 0,338442336  | 0,0738 | 4,5838  | 4,567E-06 | 0,0013154  |
| ENSMUSG00000028587  | Orc1      | 1859,93   | 0,33362834   | 0,0694 | 4,8040  | 1,555E-06 | 0,00063822 |
| ENSMUSG00000024726  | Carnmt1   | 2297,05   | 0,327255356  | 0,0662 | 4,9462  | 7,567E-07 | 0,00037644 |
| ENSMUSG00000026311  | Asb1      | 9027,54   | 0,326437974  | 0,0723 | 4,5160  | 6,301E-06 | 0,00172405 |
| ENSMUSG00000024014  | Pim1      | 5470,22   | 0,323694296  | 0,0758 | 4,2730  | 1,929E-05 | 0,00407664 |
| ENSMUSG00000041147  | Brca2     | 6849,03   | 0,315660183  | 0,0680 | 4,6417  | 3,455E-06 | 0,00107015 |
| ENSMUSG00000037458  | Azin1     | 22638,39  | 0,313299149  | 0,0713 | 4,3964  | 1,101E-05 | 0,00269637 |
| ENSMUSG00000014956  | Ppp1cb    | 29803,94  | 0,311409223  | 0,0591 | 5,2715  | 1,353E-07 | 8,5437E-05 |
| ENSMUSG00000042029  | Ncapg2    | 13627,50  | 0,306160104  | 0,0663 | 4,6146  | 3,939E-06 | 0,00117582 |
| ENSMUSG00000078652  | Psme3     | 11512,23  | 0,294962666  | 0,0645 | 4,5732  | 4,803E-06 | 0,00135938 |
| ENSMUSG00000044763  | Trmt10c   | 1609,37   | 0,285364572  | 0,0630 | 4,5317  | 5,852E-06 | 0,00162836 |
| ENSMUSG00000022100  | Xpo7      | 46144,25  | 0,283446098  | 0,0581 | 4,8791  | 1,065E-06 | 0,00051446 |
| ENSMUSG00000020124  | Usp15     | 19152,63  | 0,266303671  | 0,0646 | 4,1214  | 3,765E-05 | 0,00650402 |
| ENSMUSG00000018983  | E2f2      | 16239,36  | 0,251422501  | 0,0578 | 4,3521  | 1,348E-05 | 0,00307457 |
| ENSMUSG00000027452  | Acss1     | 4400,92   | 0,234692666  | 0,0570 | 4,1191  | 3,803E-05 | 0,00650402 |
| ENSMUSG00000002222  | Rmnd5a    | 12160,35  | 0,176302913  | 0,0431 | 4,0889  | 4,334E-05 | 0,00711561 |
| ENSMUSG000000064147 | Rab44     | 9871,82   | -0,274455612 | 0,0650 | -4,2238 | 2,402E-05 | 0,00469484 |
| ENSMUSG00000062031  | Pgghg     | 1793,80   | -0,291288317 | 0,0709 | -4,1108 | 3,943E-05 | 0,00667388 |
| ENSMUSG00000001248  | Gramd1a   | 5759,92   | -0,338672236 | 0,0727 | -4,6567 | 3,214E-06 | 0,0010309  |
| ENSMUSG00000026335  | Pam       | 18845,73  | -0,366101523 | 0,0865 | -4,2321 | 2,315E-05 | 0,00457892 |
| ENSMUSG00000028041  | Adam15    | 3528,81   | -0,367155974 | 0,0789 | -4,6534 | 3,265E-06 | 0,0010309  |
| ENSMUSG00000019970  | Sgk1      | 5005,05   | -0,375885954 | 0,0918 | -4,0942 | 4,236E-05 | 0,00709679 |
| ENSMUSG00000038168  | P3h2      | 1500,45   | -0,425216887 | 0,1029 | -4,1326 | 3,587E-05 | 0,00626479 |
| ENSMUSG00000040964  | Arhgef10l | 2422,98   | -0,436914994 | 0,0903 | -4,8368 | 1,319E-06 | 0,00058536 |
| ENSMUSG00000024529  | Lox       | 12761,01  | -0,485552744 | 0,1002 | -4,8454 | 1,264E-06 | 0,00057632 |
| ENSMUSG00000018906  | P4ha2     | 1956,33   | -0,530675282 | 0,1298 | -4,0890 | 4,333E-05 | 0,00711561 |
| ENSMUSG00000070407  | Hs3st3b1  | 563,22    | -0,534602048 | 0,1074 | -4,9781 | 6,42E-07  | 0,00032936 |
| ENSMUSG00000082286  | Pisd-ps1  | 1200,78   | -0,542514183 | 0,0758 | -7,1580 | 8,188E-13 | 3,3604E-09 |
| ENSMUSG00000027848  | Olfml3    | 6558,00   | -0,557740206 | 0,1236 | -4,5125 | 6,406E-06 | 0,00172405 |
| ENSMUSG00000006369  | Fbln1     | 805,99    | -0,5642298   | 0,0883 | -6,3875 | 1,686E-10 | 3,4596E-07 |
| ENSMUSG00000024247  | Pkdcc     | 1194,26   | -0,582029945 | 0,0993 | -5,8624 | 4,561E-09 | 4,1602E-06 |
| ENSMUSG00000036412  | Arsi      | 588,12    | -0,606909589 | 0,1416 | -4,2855 | 1,823E-05 | 0,00393819 |
| ENSMUSG00000022780  | Meltf     | 3915,07   | -0,610547105 | 0,1255 | -4,8630 | 1,156E-06 | 0,00054222 |
| ENSMUSG00000023249  | Parp3     | 1750,57   | -0,619348953 | 0,1473 | -4,2040 | 2,622E-05 | 0,00500555 |
| ENSMUSG00000023800  | Tiam2     | 3401,10   | -0,621360012 | 0,1480 | -4,1976 | 2,698E-05 | 0,00504513 |
| ENSMUSG00000025504  | Eps8l2    | 1417,50   | -0,621590052 | 0,1463 | -4,2496 | 2,141E-05 | 0,00434025 |
| ENSMUSG00000056919  | Cep162    | 1812,98   | -0,630199781 | 0,1226 | -5,1410 | 2,733E-07 | 0,00016621 |
| ENSMUSG00000015709  | Arnt2     | 382,37    | -0,658474586 | 0,1582 | -4,1610 | 3,168E-05 | 0,00565377 |

|                    |          |          |              |        |         |           |            |
|--------------------|----------|----------|--------------|--------|---------|-----------|------------|
| ENSMUSG00000054252 | Fgfr3    | 3326,62  | -0,663173742 | 0,1603 | -4,1364 | 3,529E-05 | 0,00622878 |
| ENSMUSG00000016200 | Syt14    | 492,44   | -0,678769167 | 0,1457 | -4,6592 | 3,175E-06 | 0,0010309  |
| ENSMUSG00000061718 | Ppp1r1b  | 488,73   | -0,700324759 | 0,1500 | -4,6693 | 3,022E-06 | 0,0010309  |
| ENSMUSG00000031952 | Chst5    | 300,22   | -0,710824866 | 0,1422 | -4,9976 | 5,805E-07 | 0,00030742 |
| ENSMUSG00000039084 | Chad     | 13815,97 | -0,737723134 | 0,1675 | -4,4051 | 1,057E-05 | 0,00267026 |
| ENSMUSG00000001494 | Sost     | 2717,25  | -0,739783454 | 0,1707 | -4,3338 | 1,466E-05 | 0,00329594 |
| ENSMUSG00000042073 | Abhd14b  | 399,44   | -0,742321486 | 0,1740 | -4,2657 | 1,992E-05 | 0,00408861 |
| ENSMUSG00000044006 | Cilp2    | 3998,14  | -0,787026677 | 0,1640 | -4,7982 | 1,601E-06 | 0,0006412  |
| ENSMUSG00000006403 | Adamts4  | 350,19   | -0,862034626 | 0,1392 | -6,1943 | 5,855E-10 | 8,7376E-07 |
| ENSMUSG00000032872 | Cyb5r4   | 6144,96  | -0,891695898 | 0,2102 | -4,2421 | 2,215E-05 | 0,0044341  |
| ENSMUSG00000042254 | Cilp     | 40930,26 | -0,937919323 | 0,1593 | -5,8887 | 3,894E-09 | 4,1602E-06 |
| ENSMUSG00000101429 | BC055402 | 490,11   | -1,067626246 | 0,2287 | -4,6689 | 3,028E-06 | 0,0010309  |
| ENSMUSG00000026077 | Npas2    | 225,78   | -1,248982415 | 0,3001 | -4,1625 | 3,148E-05 | 0,00565377 |
| ENSMUSG00000098975 | Gm27177  | 363,36   | -7,324938074 | 1,2034 | -6,0870 | 1,151E-09 | 1,4978E-06 |
| ENSMUSG00000105790 | Gm24105  | 102,88   | -23,94383664 | 3,6786 | -6,5090 | 7,565E-11 | 1,7741E-07 |

**Supplemental Table 2** Clinical parameters of patient donors providing cartilage samples within this study

| <b>Group</b> | <b>OARSI Score</b> | <b>Age (years)</b> | <b>Sex (m/f)</b> | <b>Synovitis (y/n)</b> | <b>BMI (kg/m<sup>2</sup>)</b> |
|--------------|--------------------|--------------------|------------------|------------------------|-------------------------------|
| Healthy      | 0                  | 60 +/- 11.3        | 2/3              | 1/4                    | 30.4 +/- 4.21                 |
| Mild         | 1.0 - 2.5          | 65 +/- 9.2         | 2/3              | 1/4                    | 33.4 +/- 5.12                 |
| Advanced     | > 3.0              | 69 +/- 9.9         | 5/3              | 1/7                    | 26.2 +/- 4.30                 |

**Supplemental Table 3** List of antibodies used within this study

| <b>Antibody</b>              | <b>Application</b> | <b>Manufacturer</b> | <b>Cat. No.</b> | <b>Conjugation</b>                           |
|------------------------------|--------------------|---------------------|-----------------|----------------------------------------------|
| TRPC1                        | IHC-DAB            | Alomone             | a018            | unconjugated                                 |
| TRPC1                        | IF                 | Alomone             | a010            | unconjugated                                 |
| Type II collagen             | IHC-F              | Merck               | MAB8887         | unconjugated                                 |
| Type X collagen              | IHC-F              | Quartett            | CO097-05        | unconjugated                                 |
| Sox9                         | IHC-F              | Merck               | MAB5535         | unconjugated                                 |
| Ki67                         | IHC-F              | Leica<br>Biosystems | Ki67P-CE        | unconjugated                                 |
| p16INK4a                     | WB                 | Abcam               | ab211542        | unconjugated                                 |
| GAPDH                        | WB                 | Cell Signaling      | 5174            | unconjugated                                 |
| p16INK4a                     | IHC-F              | Abcam               | ab54210         | unconjugated                                 |
| Phalloidin                   | IF                 | ThermoFisher        | AB22287         | Alexa Fluor 647<br>Horseradish<br>peroxidase |
| Goat anti-rabbit IgG (H+L)   | WB                 | DAKO                | P0448           |                                              |
| Rabbit anti-mouse IgG (H+L)  | IHC-F              | ThermoFisher        | A11059          | Alexa Fluor 488                              |
| Donkey anti-mouse IgG (H+L)  | IHC-F              | ThermoFisher        | A31570          | Alexa Fluor 555                              |
| Donkey anti-rabbit IgG (H+L) | IHC-F              | ThermoFisher        | A10040          | Alexa Fluor 546                              |

**Supplemental Table 4** List of primers using within this study

| <b>Gene</b>     | <b>Taqman Probe</b> | <b>FW sequence</b>                         | <b>RV sequence</b>                        |
|-----------------|---------------------|--------------------------------------------|-------------------------------------------|
| <i>Actb</i>     | Mm02619580_g1       | -                                          | -                                         |
| <i>Aggrecan</i> | Mm00545798_m1       | -                                          | -                                         |
| <i>B2M</i>      | Mm00437762_m1       | -                                          | -                                         |
| <i>Col1a1</i>   | Mm00801666_g1       | -                                          | -                                         |
| <i>Col2a1</i>   | Mm01309565_m1       | -                                          | -                                         |
| <i>Gapdh</i>    | Mm99999916_g1       | -                                          | -                                         |
| <i>Sox9</i>     | Mm00448840_m1       | -                                          | -                                         |
| <i>Actb</i>     | -                   | TGA CGG GGT CAC CCA CAC<br>TGT GCC CAT CTA | CTA GAA GCA TTT GCG GTG<br>GAC GAT GGA GG |
| <i>B2M</i>      | -                   | AGA GGT CCT TTT CAC CAG<br>CA              | TCA GTC TCA GTG GGG GTG<br>AA             |
| <i>Gapdh</i>    | -                   | AGC AAG GAC ACT GAG CAA<br>GAG AGG         | GGG TCT GGG ATG GAA ATT<br>GTG AGG        |
| <i>p16INK4a</i> | -                   | CCC AAC GCC CCG AAC T                      | GCA GAA GAG CTG CTA CGT<br>GAA            |
